# Supplementary material for: Attitudes of Neurologists to Brain Death and Organ Donation in China: A Content Analysis
Source: Research Square preprint supplement (doi:10.21203/rs.3.rs-124139/v1), 2020-12-28
Supplement: Supplementary file 1 [file 1ad812f134508afdb251d0ce.docx]

**Table 1**  Participants’ characteristics (n=15)

Participants’ characteristics Categories N

Age group (year) 20-30

2

6

5

4

11

11

2

2

2

7

5

5

2

5

2

31-40

41-50

Gender Male

Female

Hospital Second hospital of Shandong University

Yishui county hospital of Shandong province

Sishui county hospital of Shandong province

Doctor level Resident

Attending physician

Associate chief physician

Experience (year) >20

10-20

5-10

<5
